# Supplementary material
Source: PubMed Central journal article supplement (PMC4690469)
Supplement: NIHMS742999-supplement-supplemental_material.pdf [file NIHMS742999-supplement-supplemental_material.pdf]

# Supporting Information

## Electrocatalytic O<sub>2</sub>-Reduction by Synthetic Cytochrome *c* Oxidase Mimics: Identification of a “Bridging Peroxo” Intermediate Involved in Facile 4e<sup>-</sup>/4H<sup>+</sup> O<sub>2</sub>-Reduction

Sudipta Chatterjee,<sup>1</sup> Kushal Sengupta,<sup>1</sup> Shabnam Hematian,<sup>2</sup> Kenneth D.

Karlin,<sup>2,\*</sup> Abhishek Dey<sup>1,\*</sup>

1. Department of Inorganic Chemistry, Indian Association for the Cultivation of  
Science, Jadavpur, Kolkata 700032, India

2. Department of Chemistry, Johns Hopkins University, Baltimore, Maryland 21218,  
United States

\*Corresponding Author, Email: [icad@iacs.res.in](mailto:icad@iacs.res.in); [karlin@jhu.edu](mailto:karlin@jhu.edu)

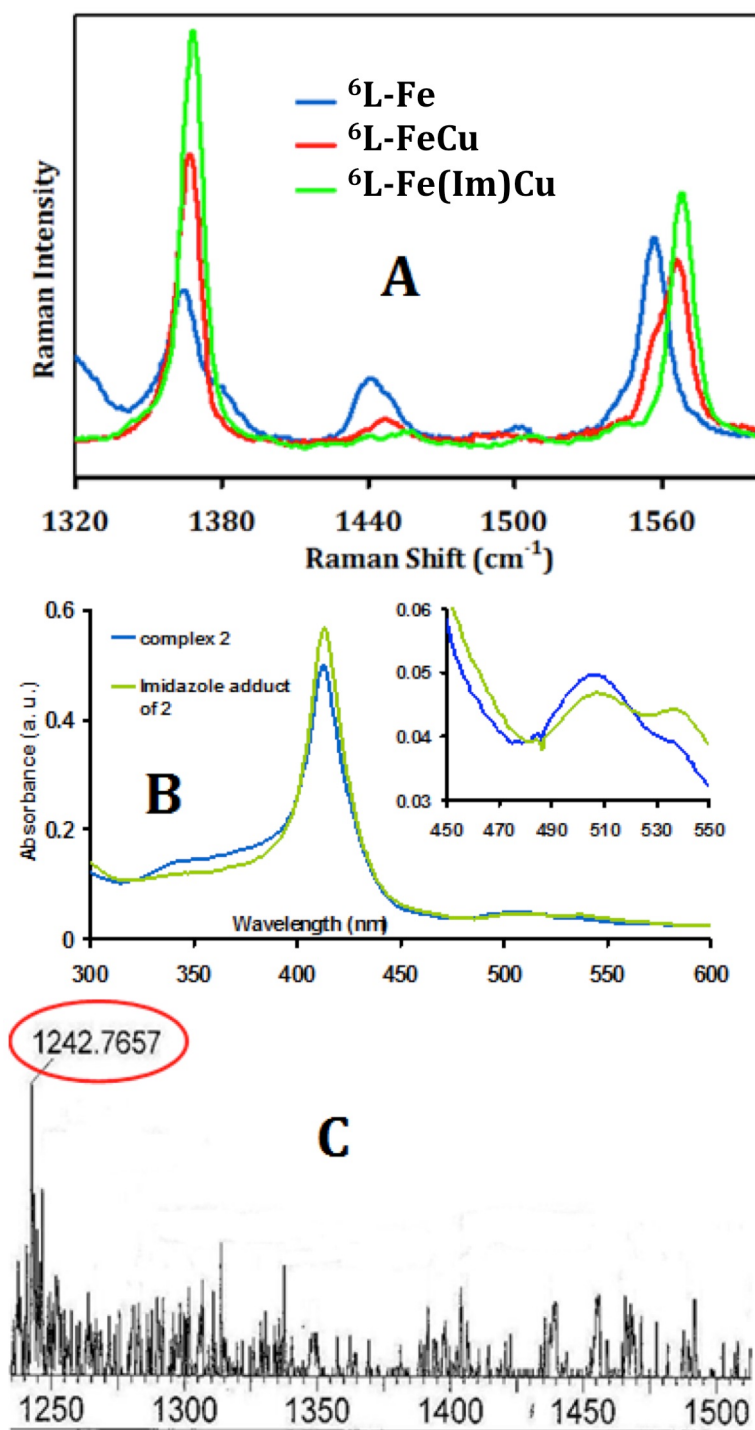

**Figure S1.** (A) Resonance Raman spectra for complex 1, 2 and 3 in dichloromethane solution at room temperature using laser of 413.1 nm wavelength. (B) UV-Vis spectra for complex 2 and its imidazole adduct (3). (C) ESI mass spectrum of 3,  $m/z = 1242$ . This is to be noted that in all the experiments, 1 equivalent of imidazole is added externally to the resting oxidized state of complex 2 to prepare complex 3 which has been further used for other electrochemical and spectroscopic experiments without any chemical treatment.

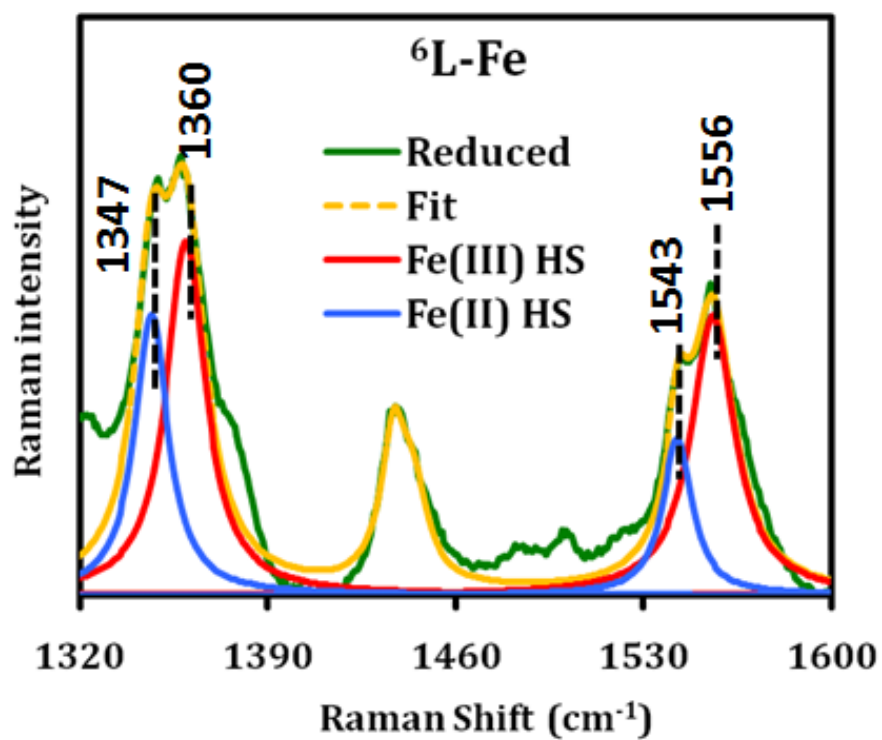

**Figure S2.** SERRS–RDE data of complex **1** under reduced condition in Ar atmosphere at constant rotation of 200 rpm. The oxidation state marker band ( $\nu_4$ ) and spin state marker band ( $\nu_2$ ) obtained at negative potential have been fit with different components using Lorentzian fit.

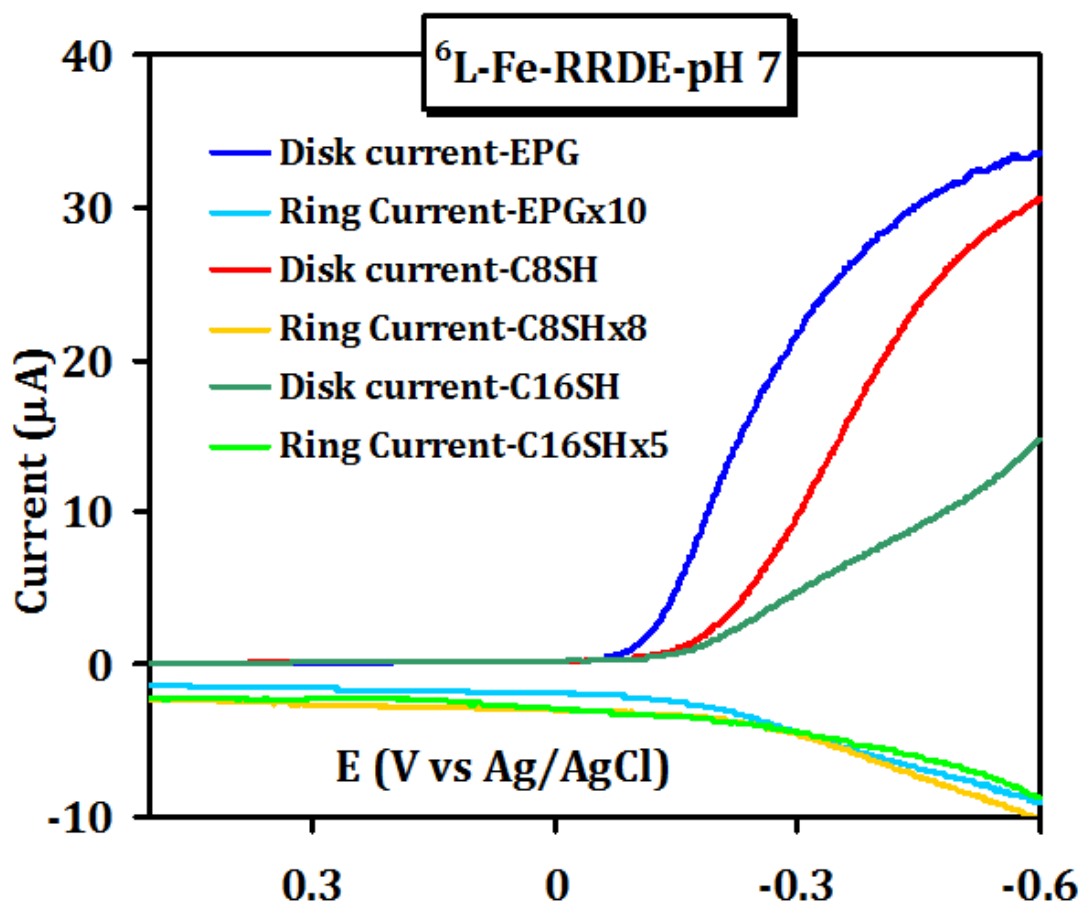

**Figure S3.** RRDE data of complex **1**, showing the disk and Pt ring currents, physisorbed on EPG (blue), C<sub>8</sub>SH modified Au (red) and C<sub>16</sub>SH modified Au (green) in air saturated pH = 7 buffer at a scan rate of 10 mV/s and rotation speed of 300 rpm, using Ag/AgCl reference and Pt wire counter electrodes. The ring currents have been multiplied for better representation of the data.

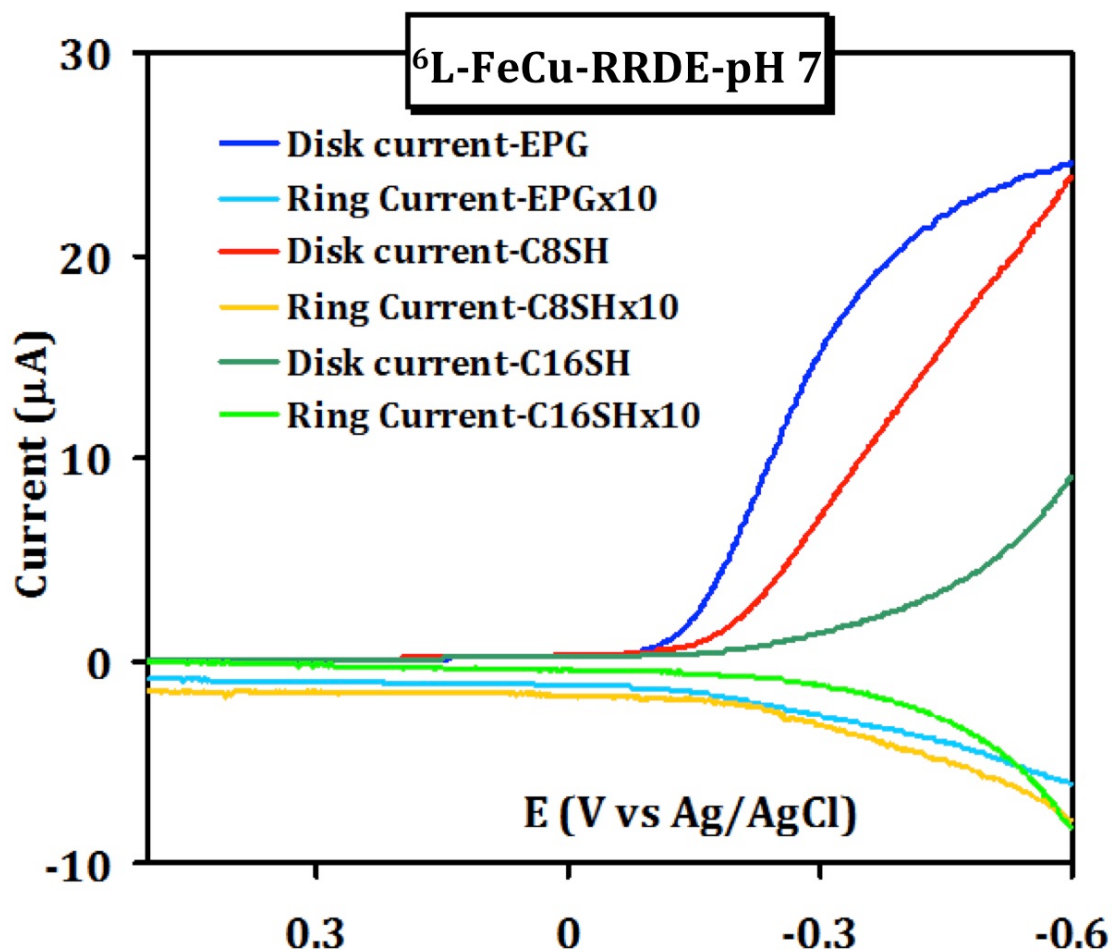

**Figure S4.** RRDE data of complex **2**, showing the disk and Pt ring currents, physisorbed on EPG (blue), C<sub>8</sub>SH modified Au (red) and C<sub>16</sub>SH modified Au (green) in air saturated pH = 7 buffer at a scan rate of 10 mV/s and rotation speed of 300 rpm, using Ag/AgCl reference and Pt wire counter electrodes. The ring currents have been multiplied for better representation of the data.

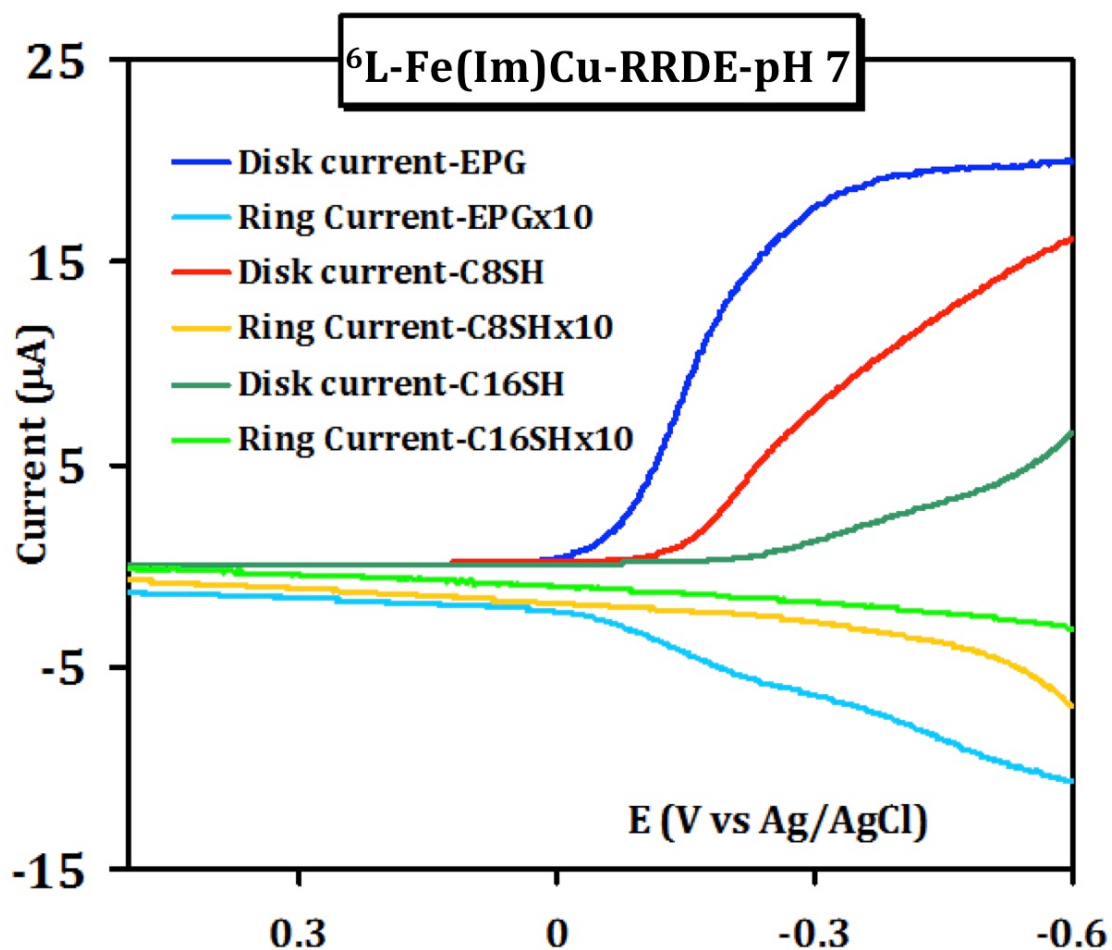

**Figure S5.** RRDE data of complex 3, showing the disk and Pt ring currents, physisorbed on EPG (blue), C<sub>8</sub>SH modified Au (red) and C<sub>16</sub>SH modified Au (green) in air saturated pH = 7 buffer at a scan rate of 10 mV/s and rotation speed of 300 rpm, using Ag/AgCl reference and Pt wire counter electrodes. The ring currents have been multiplied for better representation of the data.

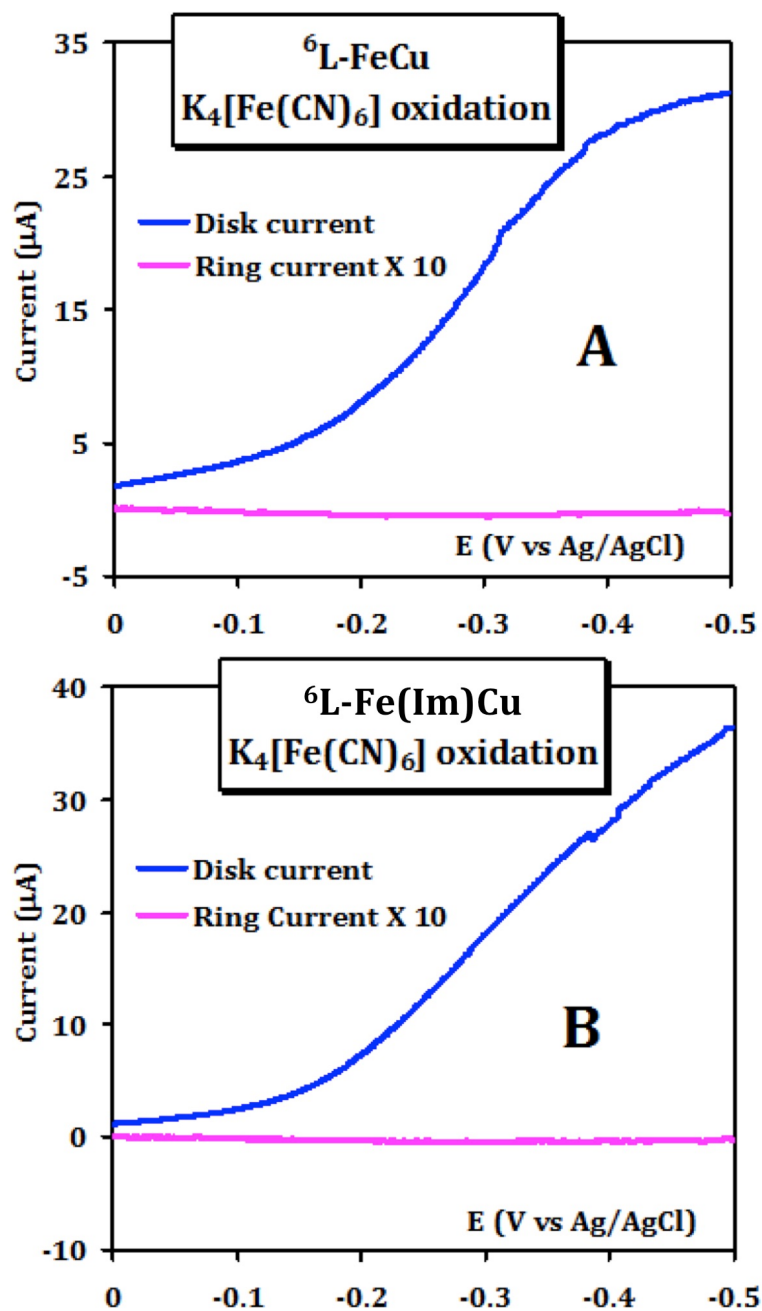

**Figure S6.** RRDE experiment of complex **2** (A) and **3** (B) when physisorbed on  $\text{C}_8\text{SH}$  modified Au surface in pH = 7 buffer containing 10 mM  $\text{K}_4[\text{Fe}(\text{CN})_6]$  using Ag/AgCl as reference and Pt wire as counter electrodes. The Pt ring has been held at 0 V (vs Ag/AgCl).

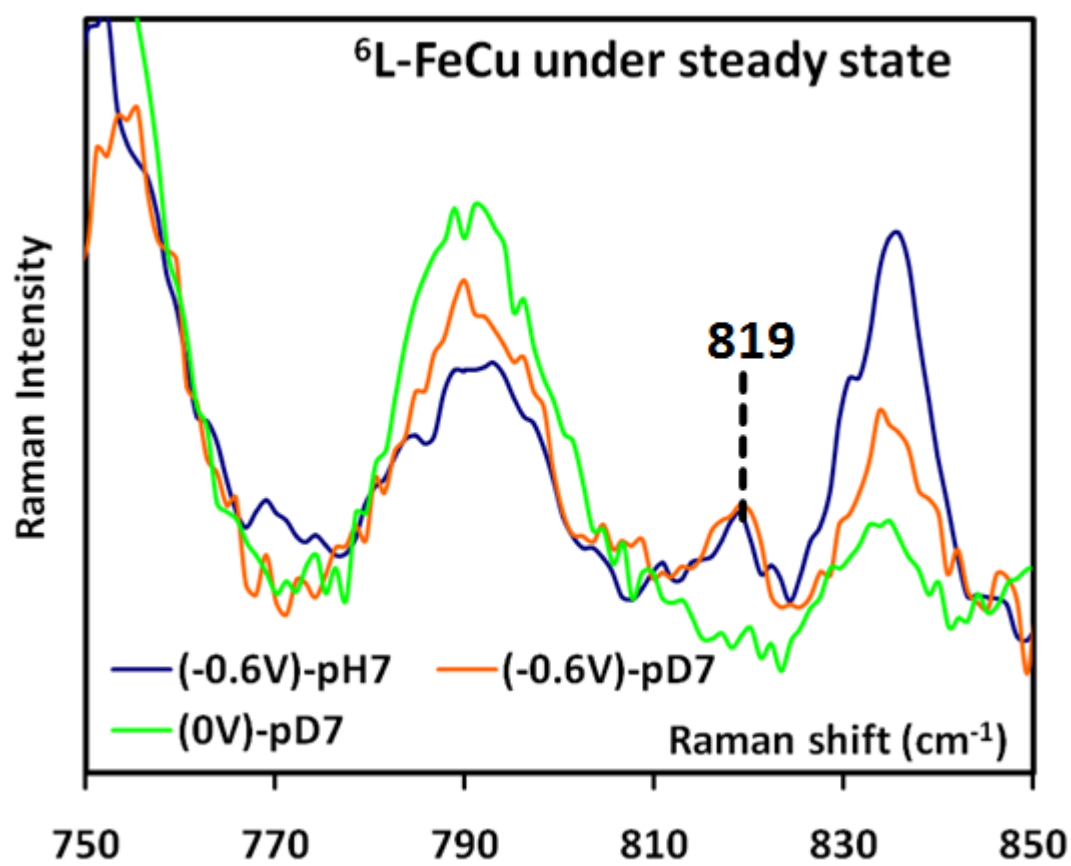

**Figure S7.** SERRS-RDE data in the low frequency region under oxidized (green) and steady state (blue for pH = 7 and orange for pD = 7) in the presence of pH = 7 and pD = 7 buffer for complex **2** on C<sub>8</sub>SH modified Ag surfaces under constant rotation of 200 rpm.

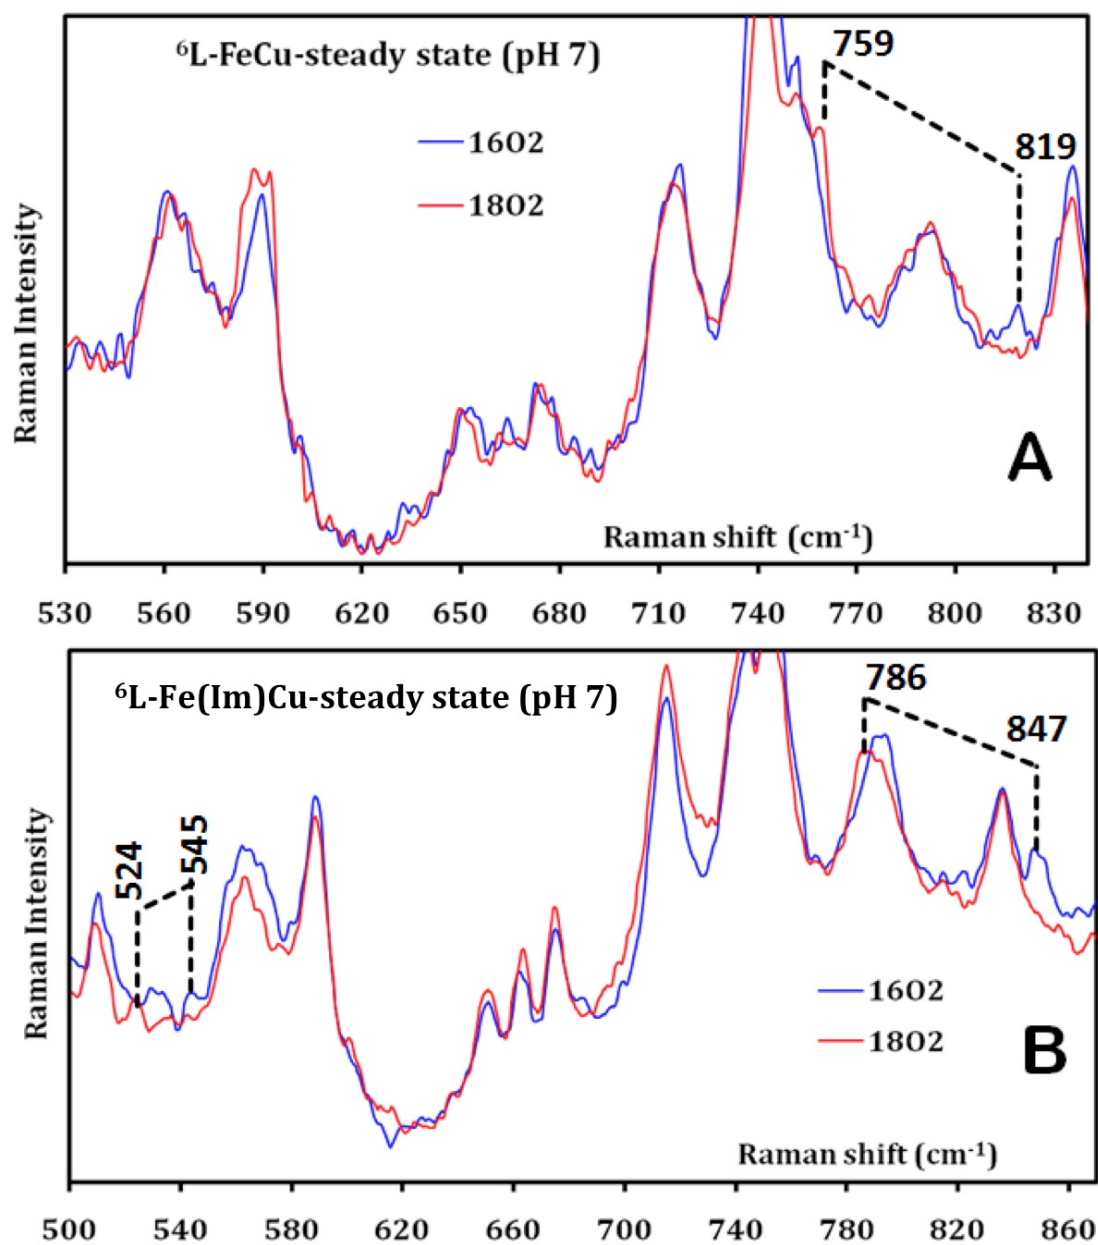

**Figure S8.** SERRS-RDE data in the low frequency region under steady state in the presence of air (blue) and <sup>18</sup>O<sub>2</sub> (red) saturated pH = 7 buffer for complex **2** (A) and complex **3** (B) on C<sub>8</sub>SH modified Ag surfaces showing the  $\nu_{\text{Fe-O/Cu-O}}$  vibrations in the region 500-550 cm<sup>-1</sup>.
